# Supplementary material for: Isothermal Amplification and Hypersensitive Fluorescence Dual-Enhancement Nucleic Acid Lateral Flow Assay for Rapid Detection of Acinetobacter baumannii and Its Drug Resistance
Source: MDPI journal article supplement (doi:10.3390/bios13100945), 2023-10-23
Supplement: s1 [file s1]

## Supporting Information

### **Isothermal amplification and hypersensitive fluorescence dual-enhancement nucleic acid lateral flow assay for rapid detection of *Acinetobacter baumannii* and its drug resistance**

Qian Wang<sup>1,2,3</sup>, Shuai Zheng<sup>2,3</sup>, Yong Liu<sup>2,4</sup>, Chongwen Wang<sup>2,3</sup>, Bing Gu<sup>3,\*</sup>, Long Zhang<sup>2,\*</sup>, Shu Wang<sup>2,4,\*</sup>

<sup>a</sup> Institutes of Physical Science and Information Technology, Anhui University, Hefei 230601, China;

wangq0323@163.com

<sup>b</sup> Hefei Institute of Physical Science, Chinese Academy of Sciences, Hefei 230036, China;

kapposnn@163.com (S.Z.); liuyong1s@163.com (Y.L.); wangchongwen1987@126.com (C.W.)

<sup>c</sup> Department of Clinical Laboratory Medicine, Guangzhou, Guangdong Provincial People's

Hospital (Guangdong Academy of Medical Sciences), Southern Medical University,

Guangzhou, Guangdong 510000, China

<sup>d</sup> Wan Jiang new industry technology development center, Tongling 244000, PR China.

\*Corresponding author

Email: gubing@gdph.org.cn (Bing Gu)

Email: zhanglong@aiofm.ac.cn (Long Zhang)

Email: wangshu87@163.com

wangshu@aiofm.ac.cn (Shu Wang)

#### **S1. Instruments**

The test strips were prepared by the QG001 high-speed continuous strip cutter and gold jet scribing instrument (Haining Wilfen Automation Equipment Co., Ltd., China). The fluorescence signals of the test strips were recorded with the -FIC-S1-Fluorescent Strip

Reader (Suzhou Hemi, China). Transmission electron microscopy (TEM) images were acquired for SiO<sub>2</sub>, Si@OD, Si@DOD and CdSe/ZnS-MPA QDs using a Tecnai G2 F20 microscope operating at 200 kV (FEI Hong Kong Ltd., China). The fluorescence characteristics of the prepared nanocomposites were analyzed with a Fast Ocean Plus Act2 spectrometer (Chelsea, UK).

## **S2. Preparation of AuNPs tags**

We first synthesized 40 nm Au nanoparticles (AuNPs) using the sodium citrate reduction method<sup>1</sup>. Next, we adjusted the pH of solution to 9 with 0.2 M K<sub>2</sub>CO<sub>3</sub> and incubated them with 1 mL AuNPs for 15 minutes. Subsequently, 50 µL of BSA (10%) was introduced to block any unreacted sites on the surface of AuNPs. The AuNPs were isolated via centrifugation (4000 rpm, 6 min), and then resuspended in a storage solution consisting of 10 mM PB buffer (1% BSA, 0.1% PVP, 10% sucrose, and 0.05% Tween-20).

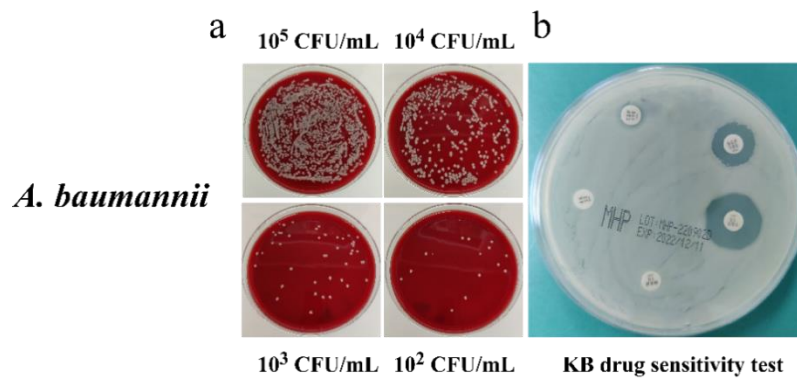

**Fig. S1.** Photographs of *A.baumannii* (a) colony growth on the blood agar plates (200  $\mu$ L of the bacterial samples with different concentrations ( $10^5$ – $10^2$  CFU/mL) was coated on the blood agar plates), (b) KB drug sensitivity test.

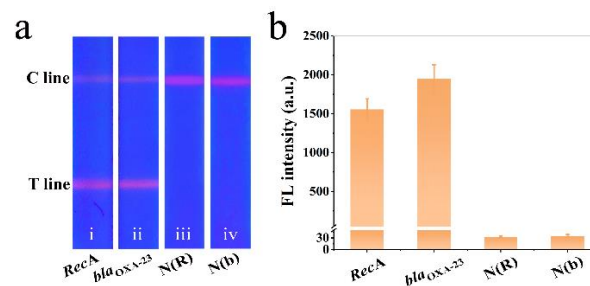

**Fig. S2.** LAMP products detection on NFLFA. (a) Fluorescence images. positive of (i) *RecA* (ii) *bla*<sub>OXA-23</sub>, negative of (i) *RecA* (ii) *bla*<sub>OXA-23</sub>. (b) corresponding fluorescence intensities.

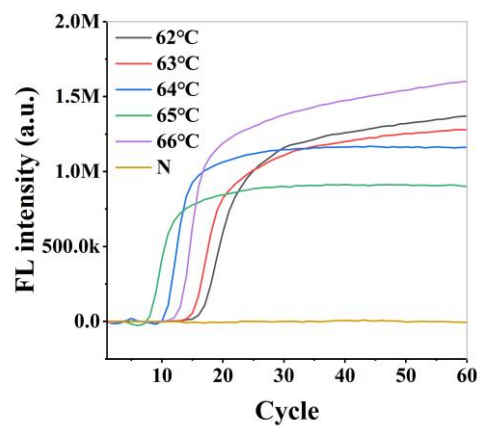

**Figure S3** Optimization of the LAMP reaction temperature of *RecA*

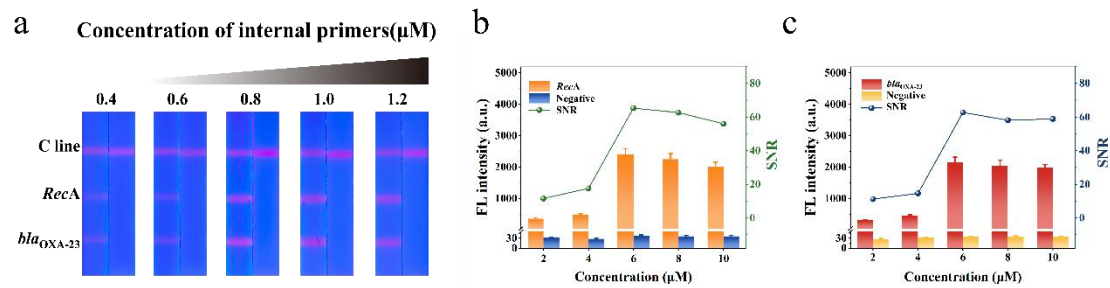

**Fig. S4.** Optimization of internal primers concentration for LAMP-NFLFA strip. (a) Fluorescence images and (b) corresponding fluorescence intensities for *RecA*. (c) corresponding fluorescence intensities for *bla*<sub>OXA-23</sub>. The error bars indicate standard deviations calculated from three measurements.

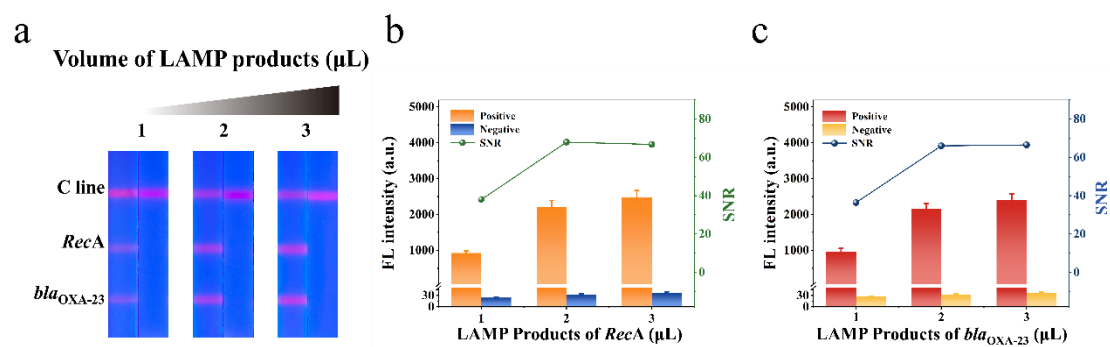

**Fig. S5.** Optimization of LAMP products volume for LAMP-NFLFA strip. (a) Fluorescence images and (b) corresponding fluorescence intensities for *RecA*. (c) corresponding fluorescence intensities for *bla*<sub>OXA-23</sub>. The error bars indicate standard deviations calculated from three measurements.

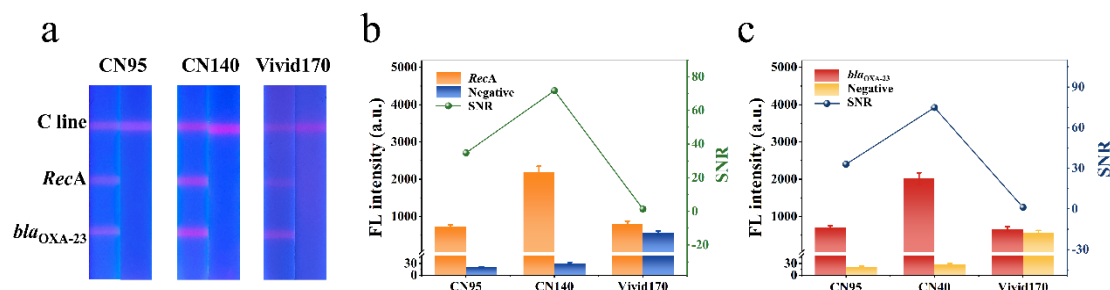

**Fig. S6.** Optimization of NC membrane for LAMP-NFLFA strip. (a) Fluorescence images and (b) corresponding fluorescence intensities for *RecA*. (c) corresponding fluorescence intensities for *bla*<sub>OXA-23</sub>. The error bars indicate standard deviations calculated from three measurements.

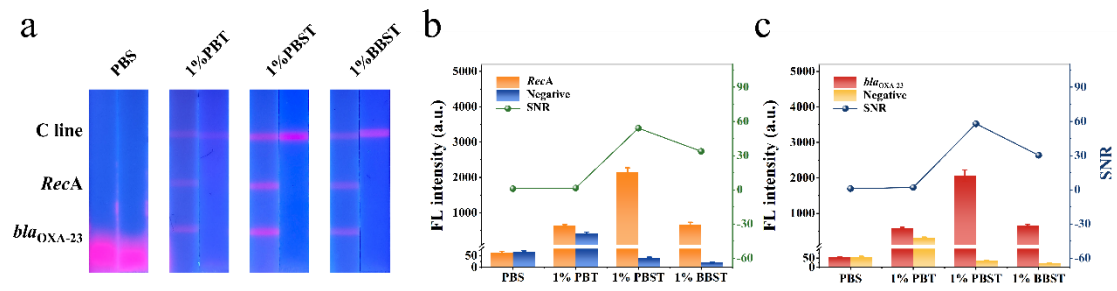

**Fig. S7.** Optimization of running buffer for LAMP-NFLFA strip. (a) Fluorescence images and (b) corresponding fluorescence intensities for *RecA*. (c) corresponding fluorescence intensities for *bla*<sub>OXA-23</sub>. The error bars indicate standard deviations calculated from three measurements.

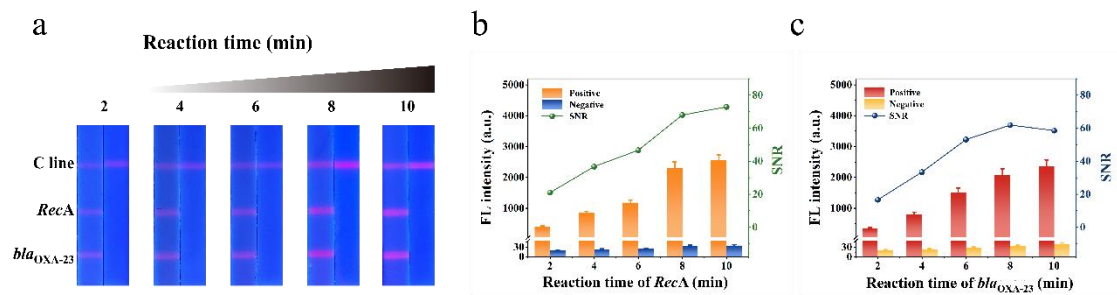

**Figure S8.** Optimization of the reaction time of the LAMP-NFLFA system. (a) Fluorescence images and (b) corresponding fluorescence intensities for *RecA*. (c) corresponding fluorescence intensities for *bla*<sub>OXA-23</sub>. The error bars are derived from the standard deviations of three independent tests.

**Table S1.** Primers sequences used in this study.

| Target gene                  | Primer | Sequence (5'-3')                             | mark                   |
|------------------------------|--------|----------------------------------------------|------------------------|
| <i>RecA</i>                  | FIP    | CGGACAAGCATGTGTCAGCAATTT-CTACTTGTTTCACAACCCG | 5'-labeled<br>Digoxin  |
|                              | BIP    | TCAGGCGCAATTGATTTAATCGT-CACCCATCTCACCTTCGA   | 5'-labeled<br>6-FAM    |
|                              | LF     | AAGTGCTTGCTCACCATTGT                         |                        |
|                              | LB     | TGTGGACTCGGTGGCTG                            |                        |
|                              | F3     | CACGCAAACCTGGTGTAG                           |                        |
|                              | B3     | CTTGTAGACCCATATGAGAGT                        |                        |
| <i>bla</i> <sub>OXA-23</sub> | FIP    | TAGACTGGGACTGCAGAAAGC-CCGCTTGGGAAAAAGACA     | 5'-labeled<br>5'Biotin |
|                              | BIP    | CAGGAACCTGCGCGACGTAT-CAATTTCAGCATTACCGAAAC   | 5'-labeled<br>6-FAM    |
|                              | LF     | TCATGGCTTCTCCTAGTGCA                         |                        |
|                              | LB     | CGGTCTTGATCTCATGCAAAAAG                      |                        |

|    |                       |
|----|-----------------------|
| F3 | GGGCGAGAAAAGGTCATT    |
| B3 | ACCAACCAGAAATTATCAACC |

**Table S2.** Recovery efficiency of *RecA* and *bla<sub>OXA-23</sub>* gene.

| Sample              | Spiked (CFU/mL)      |                             | Found (CFU/mL)       |                             | Recovery (%) |                             | RSD (% , n=3) |                             |
|---------------------|----------------------|-----------------------------|----------------------|-----------------------------|--------------|-----------------------------|---------------|-----------------------------|
|                     | <i>RecA</i>          | <i>bla<sub>OXA-23</sub></i> | <i>RecA</i>          | <i>bla<sub>OXA-23</sub></i> | <i>RecA</i>  | <i>bla<sub>OXA-23</sub></i> | <i>RecA</i>   | <i>bla<sub>OXA-23</sub></i> |
| Infusion pumps      | 10 <sup>5</sup>      | 10 <sup>5</sup>             | 9.57×10 <sup>4</sup> | 1.08×10 <sup>5</sup>        | 95           | 108                         | 8.8           | 9.7                         |
|                     | 5×10 <sup>3</sup>    | 5×10 <sup>3</sup>           | 4.69×10 <sup>3</sup> | 5.14×10 <sup>3</sup>        | 93           | 103                         | 9.2           | 8.9                         |
|                     | 1.25×10 <sup>3</sup> | 1.25×10 <sup>3</sup>        | 1.40×10 <sup>3</sup> | 1.12×10 <sup>3</sup>        | 112          | 90                          | 10.1          | 11                          |
| Medical ventilators | 10 <sup>5</sup>      | 10 <sup>5</sup>             | 8.84×10 <sup>4</sup> | 9.13×10 <sup>4</sup>        | 88           | 91                          | 8.9           | 8.7                         |
|                     | 5×10 <sup>3</sup>    | 5×10 <sup>3</sup>           | 4.36×10 <sup>3</sup> | 4.77×10 <sup>3</sup>        | 87           | 95                          | 9.5           | 9.3                         |
|                     | 1.25×10 <sup>3</sup> | 1.25×10 <sup>3</sup>        | 1.46×10 <sup>3</sup> | 1.06×10 <sup>3</sup>        | 117          | 85                          | 10.7          | 13.8                        |
| Monitors            | 10 <sup>5</sup>      | 10 <sup>5</sup>             | 1.12×10 <sup>5</sup> | 1.13×10 <sup>5</sup>        | 112          | 113                         | 8.5           | 8.2                         |
|                     | 5×10 <sup>3</sup>    | 5×10 <sup>3</sup>           | 5.90×10 <sup>3</sup> | 4.94×10 <sup>3</sup>        | 118          | 98                          | 9.8           | 9.4                         |
|                     | 1.25×10 <sup>3</sup> | 1.25×10 <sup>3</sup>        | 1.49×10 <sup>3</sup> | 1.04×10 <sup>3</sup>        | 119          | 83                          | 10.4          | 10.5                        |

**Table S3.** Details of bacterial strains from clinical.

| Serial No. | MALDITOF-MS          | Genotypic                |                             | AST results |          |
|------------|----------------------|--------------------------|-----------------------------|-------------|----------|
|            | bacterial strains    | <i>RecA</i>              | <i>bla<sub>OXA-23</sub></i> | Meropenem   | Imipenem |
| 1          | <i>A. baumannii</i>  | +                        | +                           | R           | R        |
| 2          | <i>A. baumannii</i>  | +                        | +                           | S           | R        |
| 3          | <i>A. baumannii</i>  | +                        | +                           | R           | R        |
| 4          | <i>A. baumannii</i>  | +                        | +                           | R           | S        |
| 5          | <i>A. baumannii</i>  | +                        | +                           | R           | S        |
| 6          | <i>A. baumannii</i>  | +                        | +                           | R           | R        |
| 7          | <i>A. baumannii</i>  | +                        | -                           | S           | S        |
| 8          | <i>A. baumannii</i>  | +                        | -                           | S           | S        |
| 9          | <i>A. baumannii</i>  | +                        | -                           | S           | S        |
| 10         | <i>E. faecalis</i>   | <i>Non-Acinetobacter</i> |                             |             |          |
| 11         | <i>P. aeruginosa</i> |                          |                             |             |          |
| 12         | <i>S. aureus</i>     |                          |                             |             |          |

AST, antimicrobial sensitivity testing; R, resistant; S, sensitive

**Table S4.** Recovery efficiency of *RecA* and *bla<sub>OXA-23</sub>* gene of clinical samples.

| Sample | Plate (CFU/mL)       |                             | Found (CFU/mL)       |                             | Recovery (%) |                             | RSD (% , n=3) |                             |
|--------|----------------------|-----------------------------|----------------------|-----------------------------|--------------|-----------------------------|---------------|-----------------------------|
|        | <i>RecA</i>          | <i>bla<sub>OXA-23</sub></i> | <i>RecA</i>          | <i>bla<sub>OXA-23</sub></i> | <i>RecA</i>  | <i>bla<sub>OXA-23</sub></i> | <i>RecA</i>   | <i>bla<sub>OXA-23</sub></i> |
| 1      | 8.50×10 <sup>4</sup> | 8.50×10 <sup>4</sup>        | 9.00×10 <sup>4</sup> | 9.00×10 <sup>4</sup>        | 106          | 106                         | 7.1           | 8.4                         |
| 2      | 4.80×10 <sup>3</sup> | 4.80×10 <sup>3</sup>        | 4.05×10 <sup>3</sup> | 4.12×10 <sup>3</sup>        | 84           | 86                          | 10.0          | 9.5                         |
| 3      | 1.50×10 <sup>4</sup> | 1.50×10 <sup>4</sup>        | 1.60×10 <sup>4</sup> | 1.62×10 <sup>4</sup>        | 106          | 108                         | 8.3           | 8.5                         |
| 4      | 1.60×10 <sup>3</sup> | 1.60×10 <sup>3</sup>        | 1.35×10 <sup>3</sup> | 1.20×10 <sup>3</sup>        | 84           | 75                          | 11.0          | 13.6                        |

[illegible]
